# Supplementary material for: Factors influencing physiotherapy decisions between restorative and compensatory gait rehabilitation: an Italian multicenter study
Source: Frontiers journal article supplement (doi:10.3389/fneur.2024.1368973), 2024-05-24
Supplement: Data_Sheet_1.PDF [file Data_Sheet_1.PDF]

Supplementary Material

Fig. S1. Flow diagram of analysed subjects

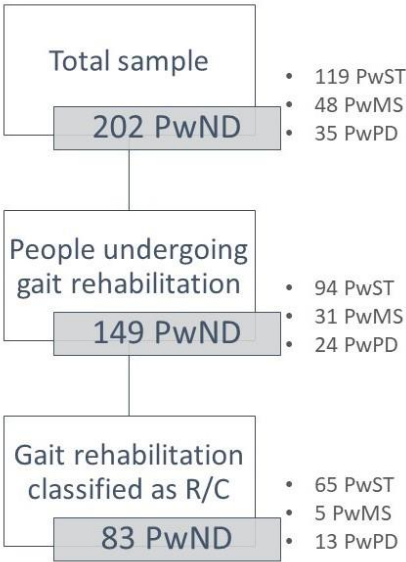

PwND: People with neurological disorders, PwST: people after stroke, PwMS: people with multiple sclerosis, PwPD people with Parkinson's disease, R: restorative approach, C: compensatory approach.

**Fig. S2.** Treatment report form administered to physiotherapists.

**PT INTERVENTION FORM**

Date \_\_\_\_\_

| Therapeutic goals              | Priority | Approach | Time                                       |
|--------------------------------|----------|----------|--------------------------------------------|
|                                | (1,2,3)  | R/C      | %                                          |
| <b>Functional - Activities</b> |          |          | sum of the 3 percentages<br>MUST BE = 100% |
| Manipulation                   |          |          |                                            |
| Walking                        |          |          |                                            |
| Postural transitions           |          |          |                                            |
| Stair climbing                 |          |          |                                            |
| ADL                            |          |          |                                            |
| <b>Impairment</b>              |          |          |                                            |
| Pain                           |          |          |                                            |
| Joint mobility                 |          |          |                                            |
| Muscle strength                |          |          |                                            |
| Sensory functions              |          |          |                                            |
| Balance                        |          |          |                                            |
| Trunk control                  |          |          |                                            |
| Standing position              |          |          |                                            |
| Tertiary prevention            |          |          |                                            |
| Cardiorespiratory fitness      |          |          |                                            |
| Cognitive function             |          |          |                                            |
| Genitourinary functions        |          |          |                                            |
| <b>Participation</b>           |          |          |                                            |
| Outdoor mobility               |          |          |                                            |
| Quality of life                |          |          |                                            |
| <b>Other</b>                   |          |          |                                            |
|                                |          |          |                                            |

**LEGEND**

**Preliminary remark:** Not all the possible therapeutic goals or treatments are already indicated in this form, please use the proper empty spaces to indicate what is not already included.

**Priority:** please indicate up to 3 main rehabilitative aims and give them a level of priority: **1(high), 2(medium), 3 (low).**

**Time %:** indicate the percentage of **time dedicated** to each selected goal, compared to total time of treatment.

**IN/OUT PATIENT:** indicate whether the setting of rehabilitative intervention is hospital-based (**IN**) or not (**OUT**).

**Restorative approach (R):** rehabilitation's goal is to restore premorbid capacity of injured functions.

**Compensatory approach(C):** rehabilitation's goal is to vicariate lost functions finding new strategies.

**SUBJECT DATA**

**Name** \_\_\_\_\_

Sessions frequency: n° \_\_\_\_\_ times/week; Total number of sessions: \_\_\_\_\_

Session lasting: \_\_\_\_ min **IN/OUT PATIENT:** ☐ IN ☐ OUT

**Other Therapies:**  
☐ Speech/swallow rehabilitation ☐ Occupational Therapy  
☐ Neuropsychologist ☐ Massage Therapy  
☐ \_\_\_\_\_ (Other)

| Interventions                                   | Goal 1 | Goal 2 | Goal 3 |
|-------------------------------------------------|--------|--------|--------|
|                                                 | % time | % time | % time |
| Aid training                                    |        |        |        |
| Aerobic training                                |        |        |        |
| Postural alignment exercises                    |        |        |        |
| Constraint induced movement therapy             |        |        |        |
| Counselling                                     |        |        |        |
| Tactile sensitivity exercises                   |        |        |        |
| Dual-task exercises                             |        |        |        |
| Manipulation-grasping exercises                 |        |        |        |
| Proprioceptive exercises                        |        |        |        |
| Vestibular exercises                            |        |        |        |
| Motor imagery                                   |        |        |        |
| Lymphatic drainage                              |        |        |        |
| Passive mobilization                            |        |        |        |
| Muscle recruitment exercises                    |        |        |        |
| Resistance training                             |        |        |        |
| Stretching                                      |        |        |        |
| Manual therapy                                  |        |        |        |
| Instrumental physical therapies (specify) _____ |        |        |        |
| Walking training                                |        |        |        |
| Balance training                                |        |        |        |
| Sensory strategies training                     |        |        |        |
| Myofascial release                              |        |        |        |
|                                                 |        |        |        |
|                                                 |        |        |        |
|                                                 |        |        |        |
|                                                 |        |        |        |
|                                                 |        |        |        |

Note: Indicate up to 5 interventions type for each goal. Specify the percentage time dedicated to each intervention. The sum must be 100% for each goal.

**Fig. S3.** Probability of having a R approach based on bivariate logistic regression analyses.

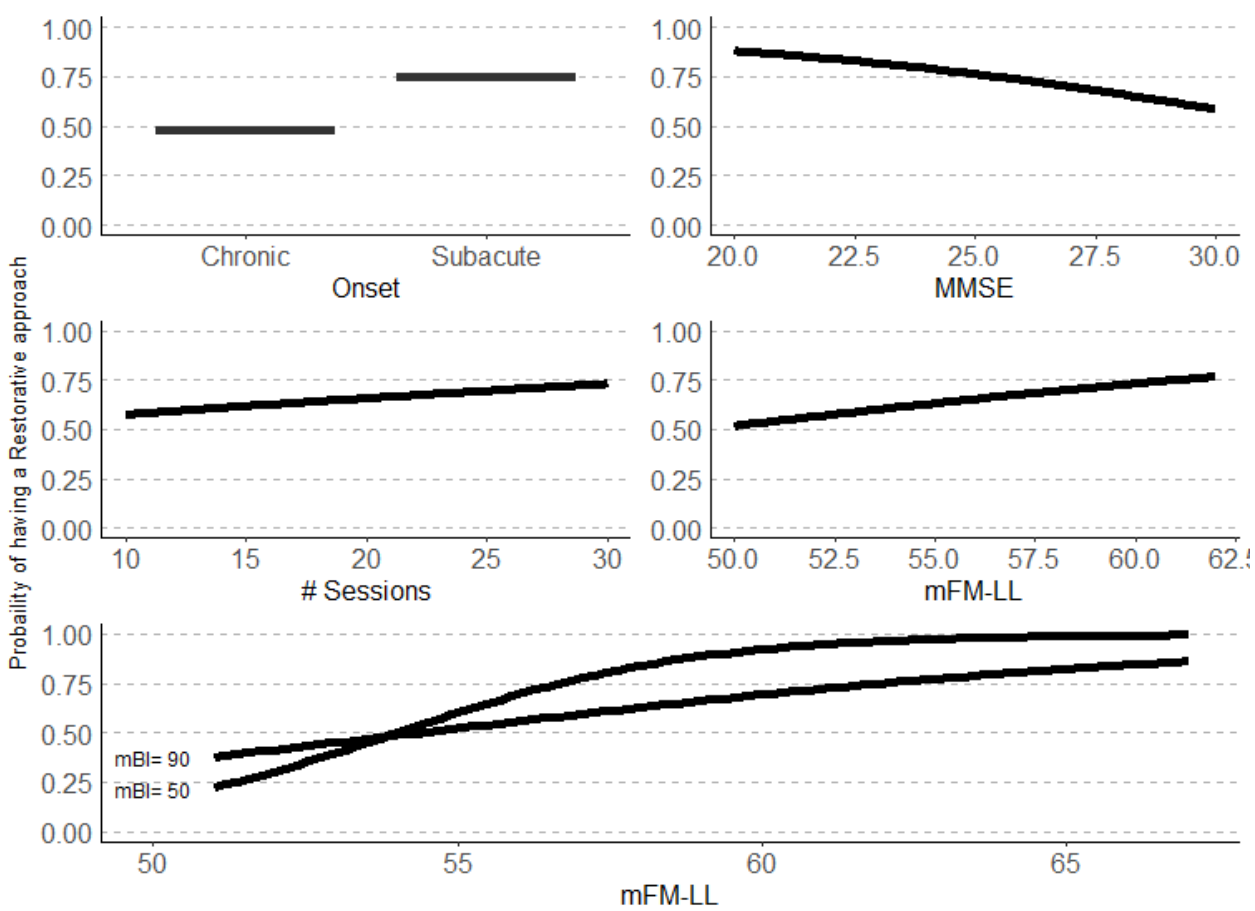

R: restorative, MMSE: Mini-Mental State Examination, mFM-LL: modified Fugl-Meyer Lower limb, mBI: modified Barthel Index.

**Fig. S4.** Interventions used to improve walking in PwND

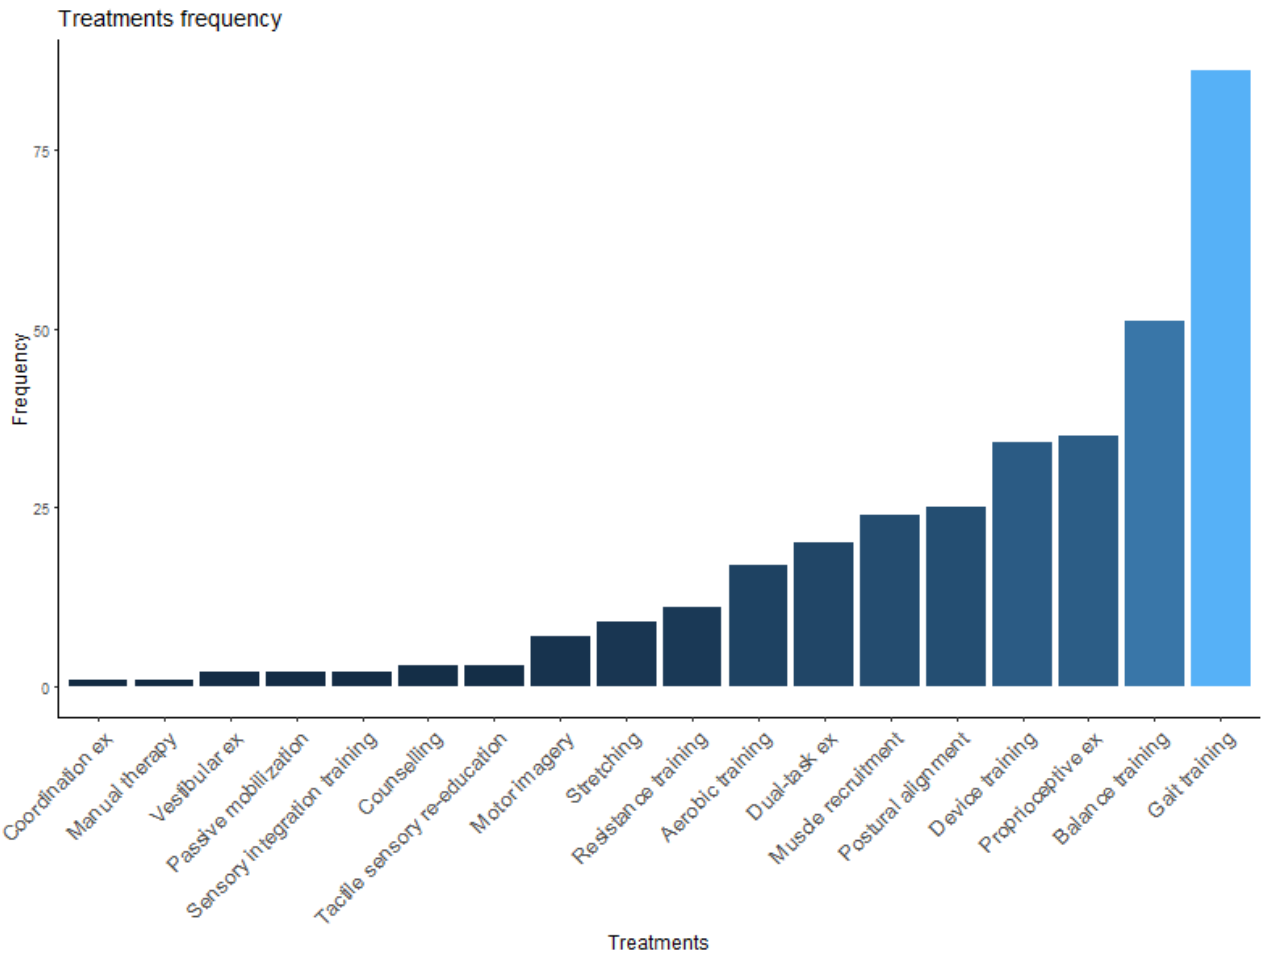

PwND: People with neurological disorders
